# Supplementary material for: Transcriptomic and Physiological Analyses of Two Rice Restorer Cultivars under Different Nitrogen Supplies Provide New Insights for Hybrid Rice Breeding
Source: Preprints.org preprint supplement (doi:10.20944/preprints202305.0813.v1), 2023-05-11
Supplement: Supplementary file 3 [file supplementary]

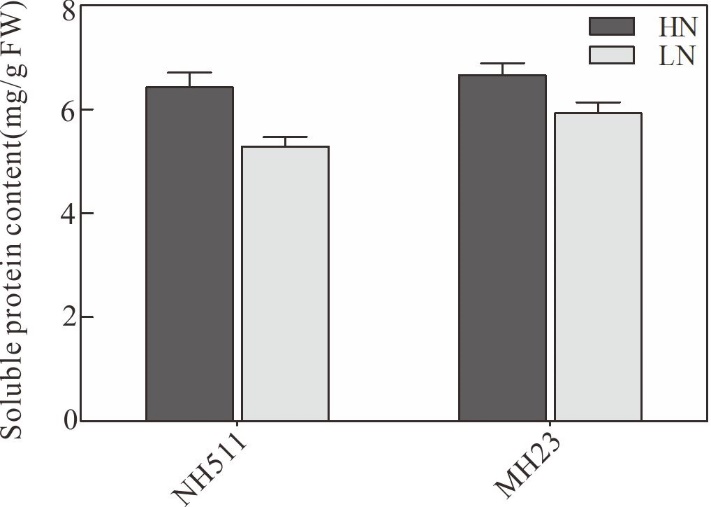


**Fig. S1** Measurement of soluble proteins under different N supplies in NH511 and MH23 respectively. The statistical analysis of comparing HN with LN was performed by t-tests in NH511 and MH23 respectively.


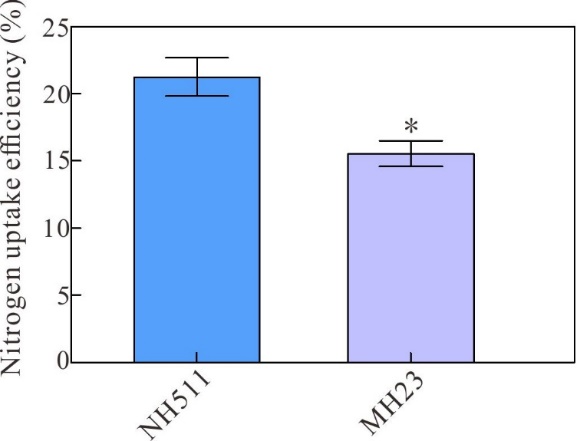


**Fig. S2** Nitrogen uptake efficiency analysis of NH511 and MH23 under HN supplies. The statistical analysis of between NH511 and MH23 was performed by t-tests. *, *P*<0.05.


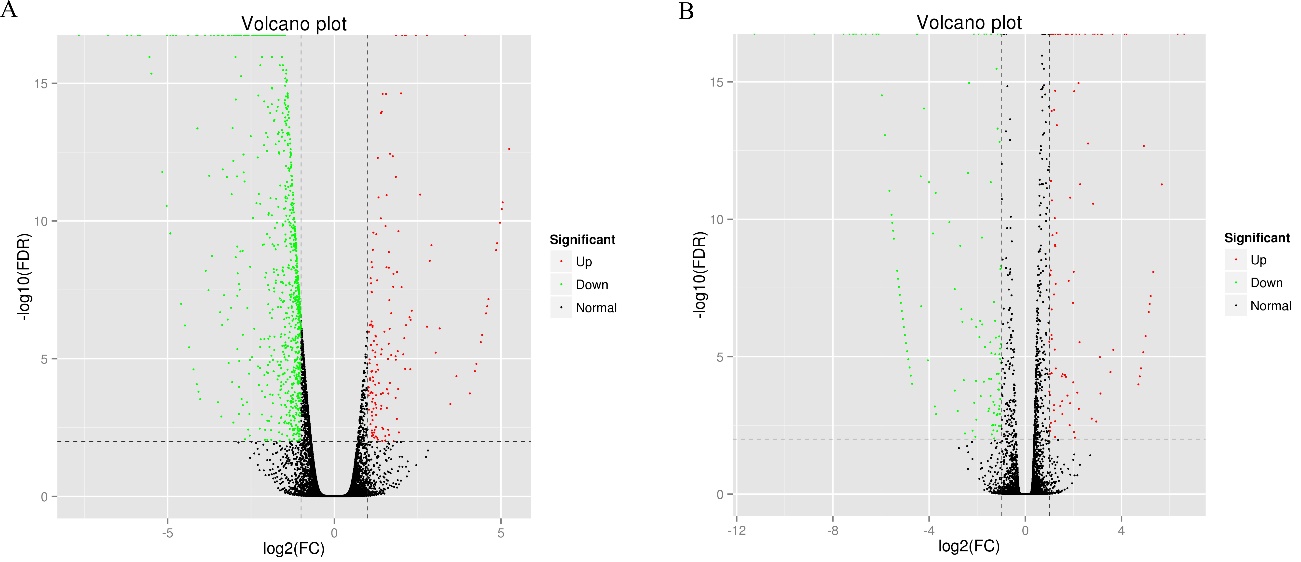


**Fig. S3** Volcano plot of DEGs identified under HN supplies. A, DEGs of NH511. The red pots represent 1576 significantly up-regulated unigenes. The green pots represent significantly down-regulated 880 unigenes. The black pots mean no significantly differential expression. B, DEGs of MH23 under HN and LN conditions. 113 significantly up-regulated unigenes and 153 down-regulated unigenes.

**
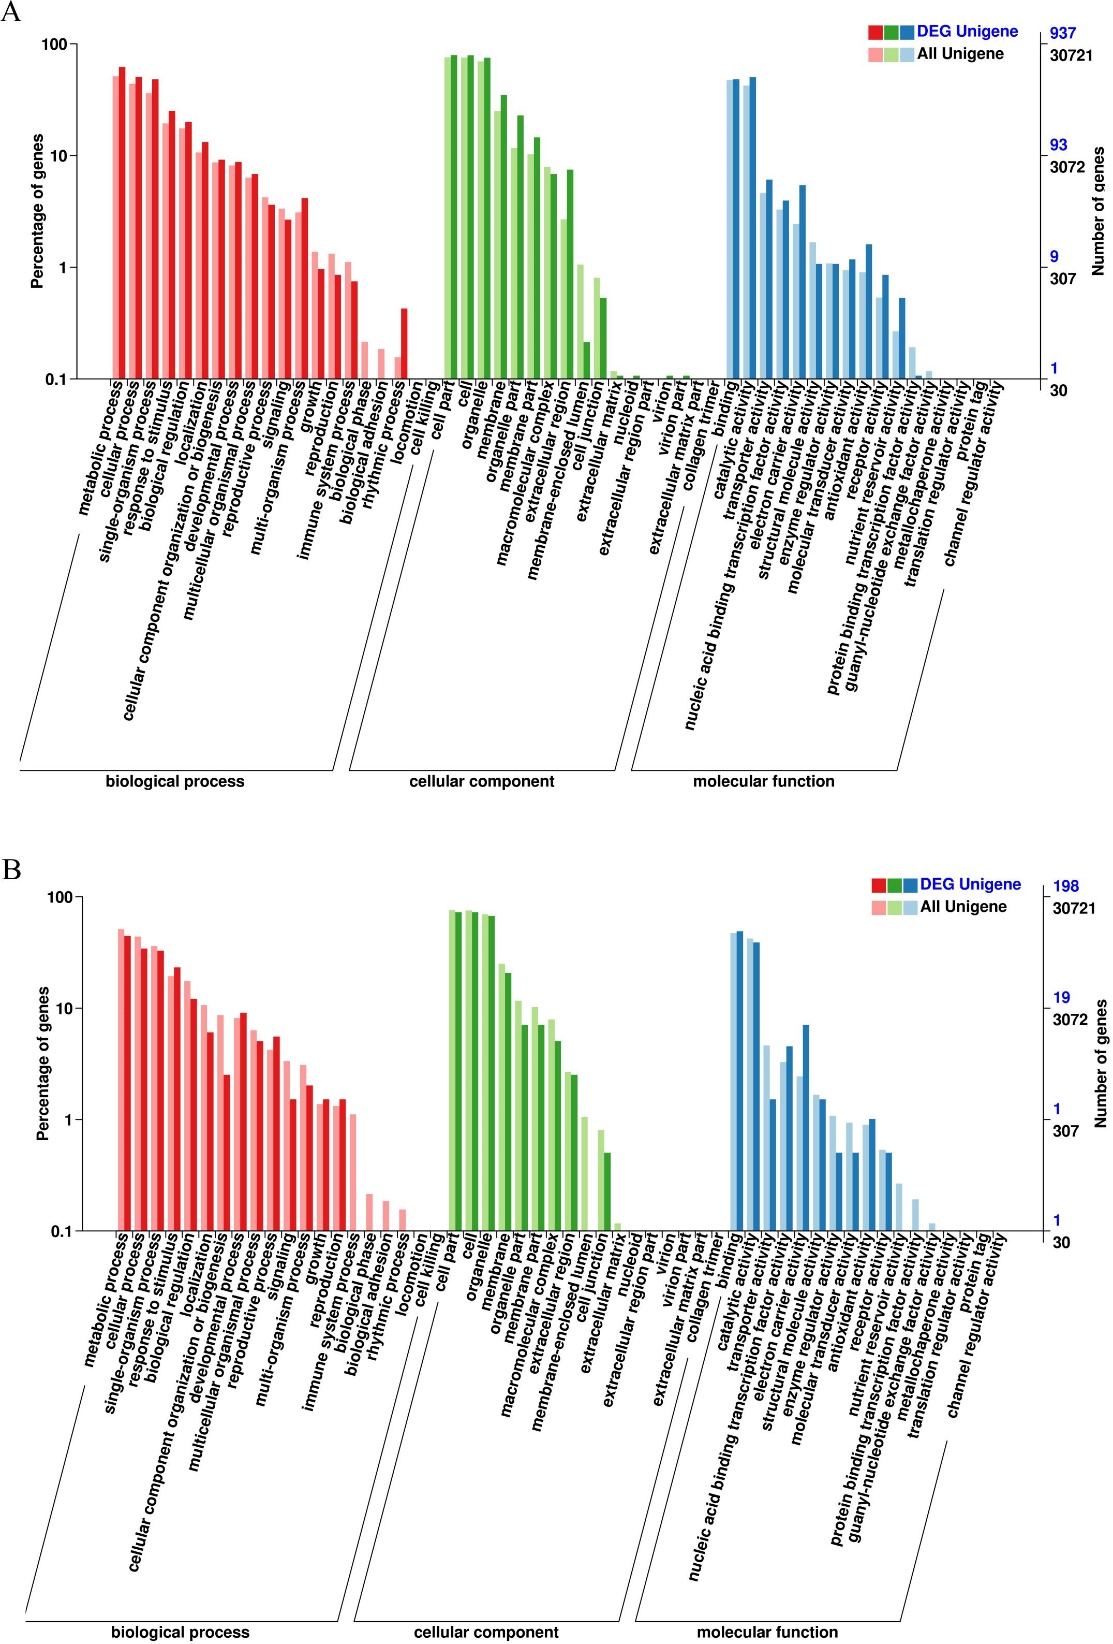
**

**Fig. S4** Histogram description of Gene Ontology enrichment of DEGs. A, GO analysis of DEGs in NH511. B, GO analysis of DEGs in MH23. The DEGs were fell into three categories: biological process (BP), cellular component (CC) and molecular function (MF). The X-axis represents various gene function, the Y-axis corresponds to the number of DEGs.

Table S1 qRT-PCR primers used in this study.

| **Primer name Sequence(5’-3’)** |
| --- |
| ACTIN1-F ACCATTGGTGCTGAGCGTTT |
| ACTIN1-R CGCAGCTTCCATTCCTATGAA |
| OsNIA1-F TCAAGGTGTGGTACGTGGTG |
| OsNIA1-R CGAGGTCATAGCCCATCTTC |
| OsNIA2-F TGTACCAGGTCATCCAGTCG  OsNIA2-R CGATGACGTACCACACCTTG  OsNRT2.1-F CTTCACGTCGTCGAGGTACT  OsNRT2.1-R CACTCGGAGCCGTAGTAGTG  OsPHI1-F TCGACGGCTTCTGCATGAG  OsPHI1-R GATCATCGAGGCGAGGGATATC  OsLSI1-F CCATAGCGATACAGTACAGGAG  OsLSI1-R GACGAACATCATGTTGAACGTC  OsLSI2-F CTGGAGATGTCGGAGAACATAA  OsLSI2-R GAAGCTCTTGAGGAACAGCTTC  OsDREB1A-F GAACTGGACGTCCTGAGTG  OsDREB1A-R CTAGTAGCTCCAGAGTGGGA  OsNAC19-F GAAGAACGAGTGGGAGAAGATG  OsNAC19-R TCGTCCATCGATTCTTTCTTGG |
